# Supplementary material for: BMP9, but not BMP10, acts as a quiescence factor on tumor growth, vessel normalization and metastasis in a mouse model of breast cancer
Source: PubMed Central journal article supplement (PMC6118004; doi:10.1186/s13046-018-0885-1), 2018-08-30

# Figure S4

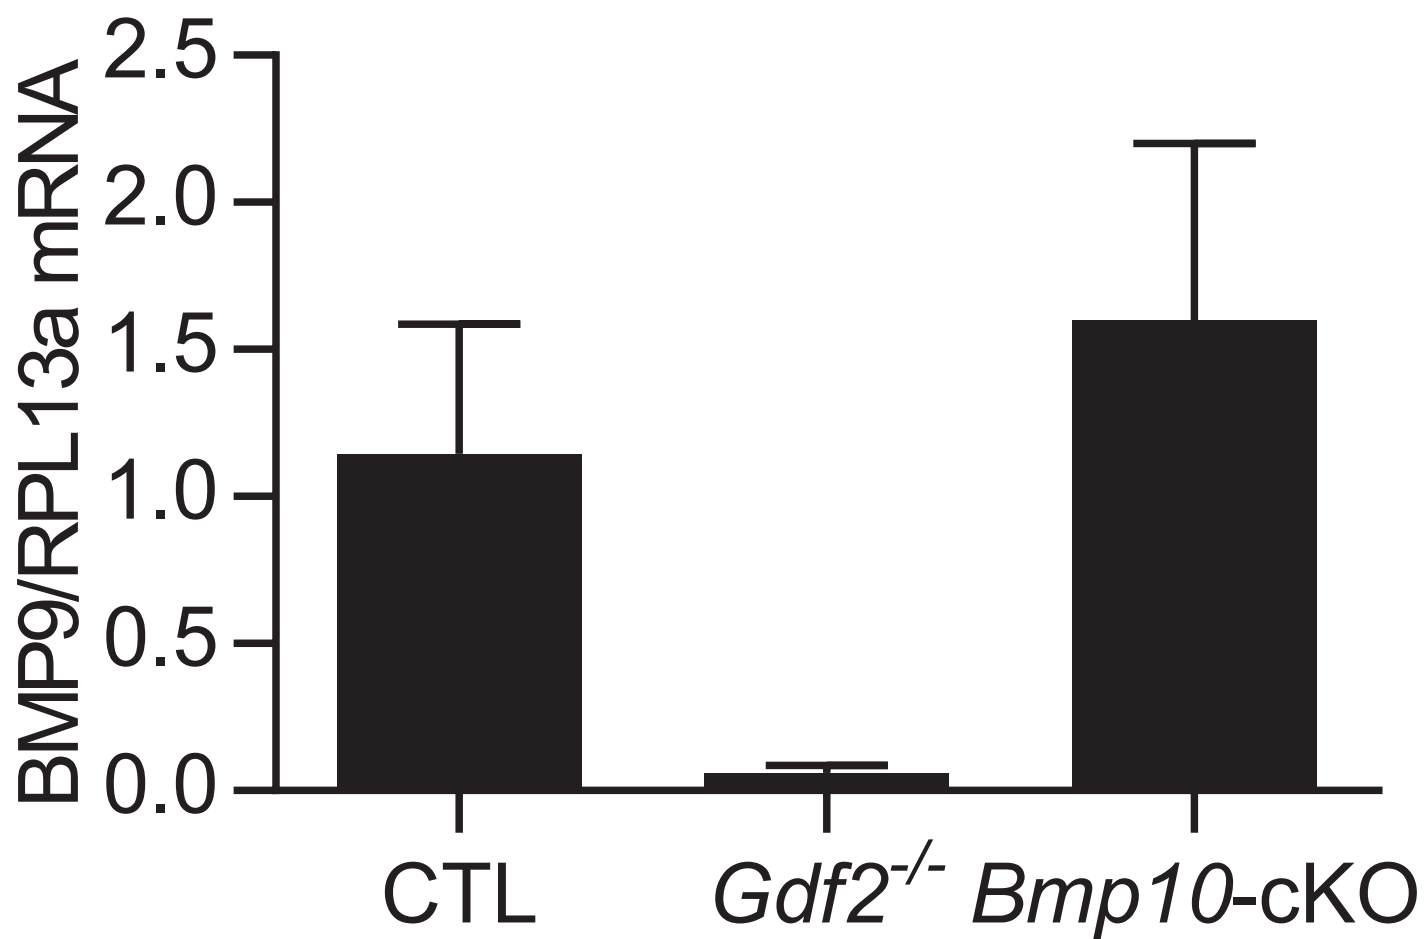

Supplement: 13046_2018_885_MOESM4_ESM.pdf [file 13046_2018_885_MOESM4_ESM.pdf]
