# Supplementary material for: BMP9, but not BMP10, acts as a quiescence factor on tumor growth, vessel normalization and metastasis in a mouse model of breast cancer
Source: Springer Nature journal article supplement (doi:10.1186/s13046-018-0885-1), 2018-08-30

**Figure S1****A**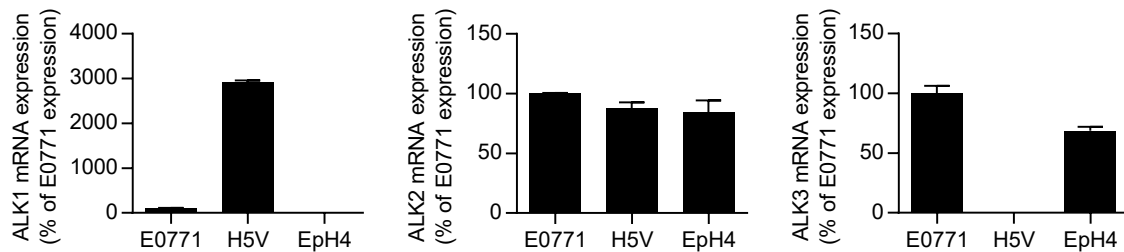**B**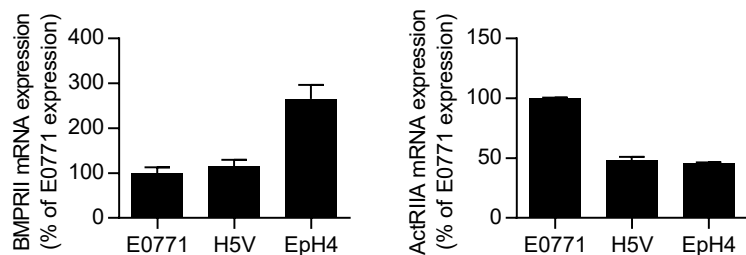**C**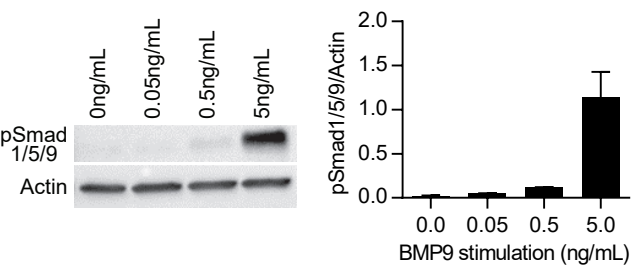**D**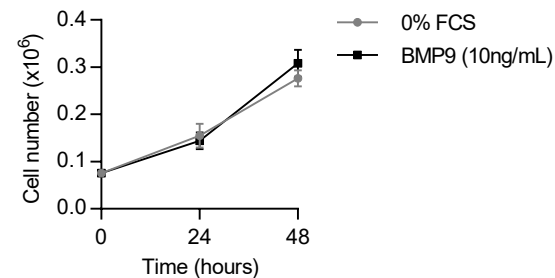**E**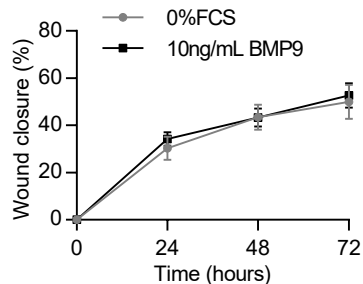**F**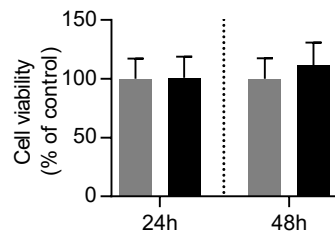**G**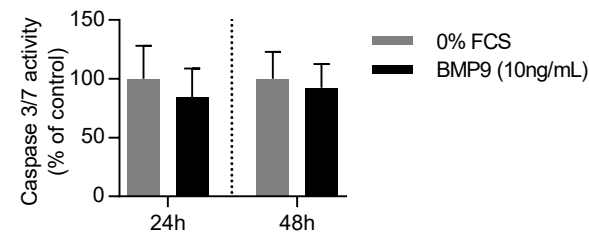

Supplement: MOESM1 [file 16086332]
