# Supplementary material for: BMP9, but not BMP10, acts as a quiescence factor on tumor growth, vessel normalization and metastasis in a mouse model of breast cancer
Source: Springer Nature journal article supplement (doi:10.1186/s13046-018-0885-1), 2018-08-30

# Figure S2

A

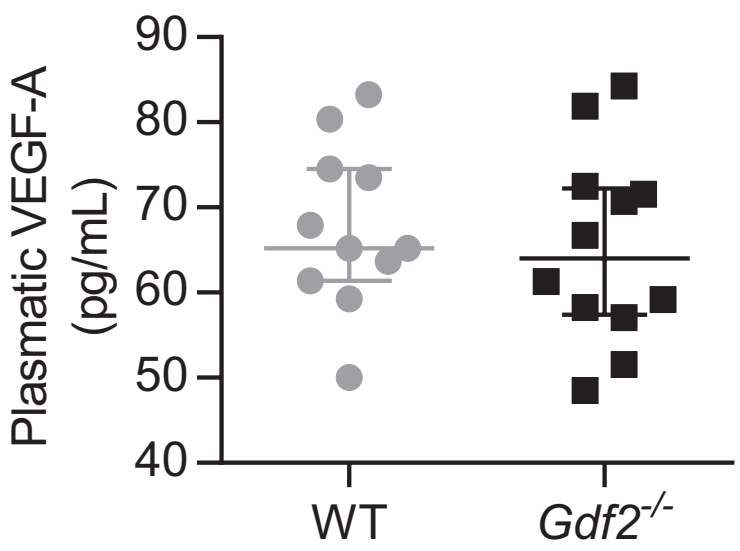

B

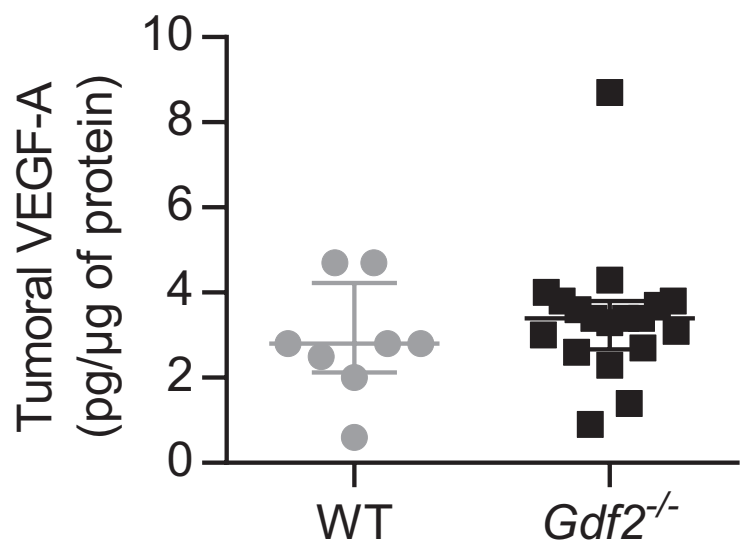

Supplement: MOESM2 [file 16086332]
